# Supplementary material for: Enhanced lipid biosynthesis in OSCC cancer associated fibroblasts contributes to tumor progression: role of IL8/AKT/p-ACLY axis
Source: Research Square preprint supplement (doi:10.21203/rs.3.rs-3376754/v1), 2023-10-11
Supplement: Supplementary file 1 [file 77395aed4a7ebf89549528f0.docx]

**Enhanced lipid biosynthesis in OSCC cancer associated fibroblasts contributes to tumor progression: role of IL8/AKT/p-ACLY axis**

*Pan Liu1, Yue Wang1, Xiang Li1, Zhenan Liu1, Yunqing Sun1, Hanzhe Liu1, Zhe Shao1,2, Erhui Jiang1,2, Xiaocheng Zhou1, 3*, Zhengjun Shang1, 2**

1*State Key Laboratory of Oral & Maxillofacial Reconstruction and Regeneration, Key Laboratory of Oral Biomedicine Ministry of Education, Hubei Key Laboratory of Stomatology, School & Hospital of Stomatology, Wuhan University, Wuhan 430079, P. R. China*

2*Department of oral and Maxillofacial Head and Neck Oncology, School & Hospital of Stomatology, Wuhan University, Wuhan 430079, P. R. China*

3*Department of oral and Maxillofacial Surgery, School & Hospital of Stomatology, Wuhan University, Wuhan 430079, P. R. China*

*Corresponding authors. E-mail addresses: [zhouxiaocheng@whu.edu.cn](mailto:Zhou@whu.edu.cn) (X. C. Zhou); shangzhengjun@whu.edu.cn (Z. Shang).

**
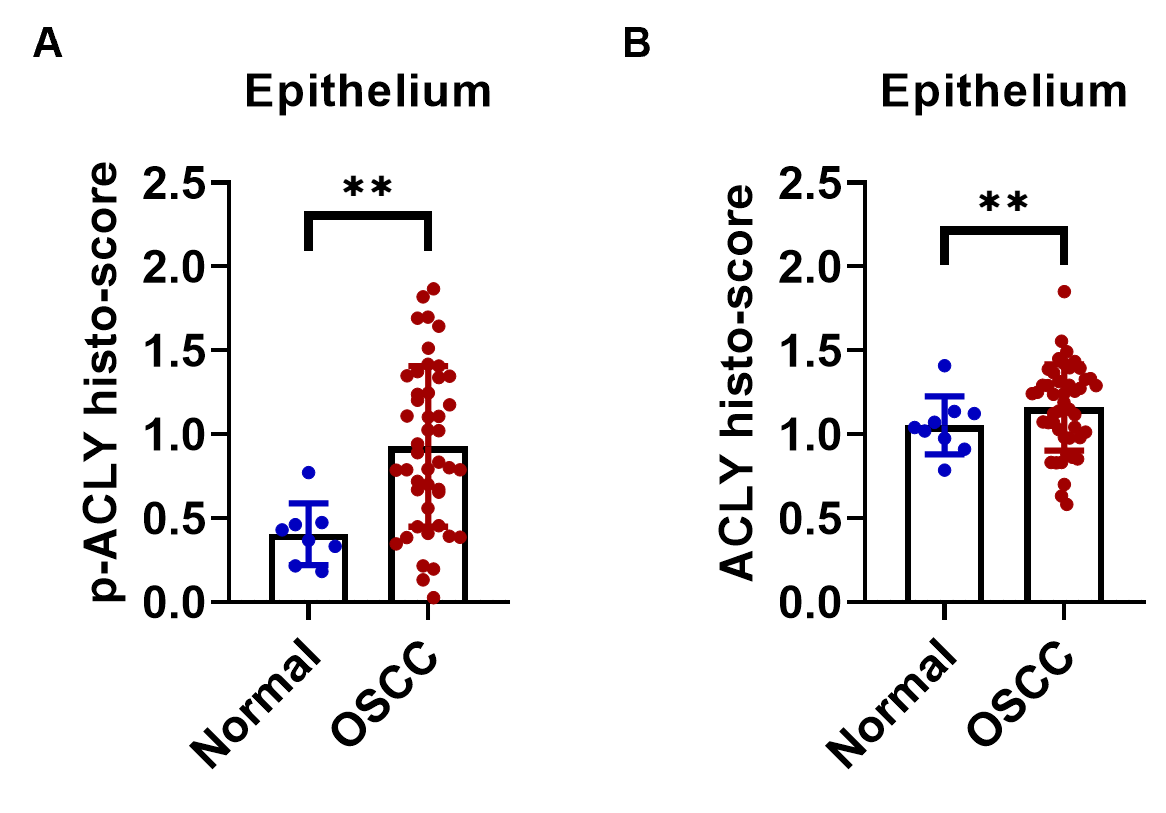
**

**Fig. S1 IHC scores of p-ACLY and ACLY expression in epithelial region of normal mucosa and OSCC tissues.** **A** IHC score of p-ACLY. **B** IHC score of ACLY. Data are presented as means ± SD. **p*<0 .05, ***p* < 0.01, and ****p* <0 .001.


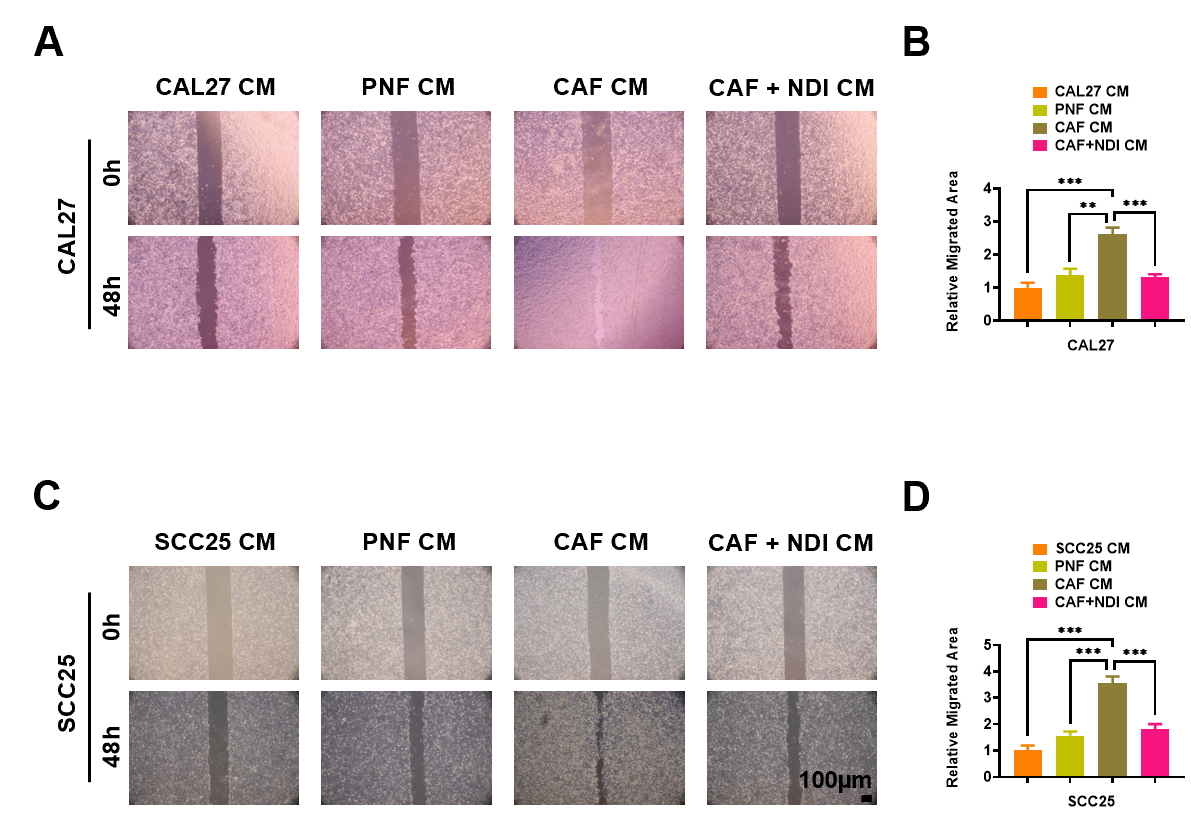


**Fig. S2 Lipid synthesis blockade in CAFs reduced CAF tumor-promoting effect on OSCC cell migration. A** and **C** Cell migration abilities of OSCC cells were analyzed by Wound healing assay. The cells were treated with indicated CM. **B** and **D** Quantitative analysis for the migration area of **A** and **C**. Data are presented as means ± SD. **p* <0 .05, ***p* < 0.01, and ****p* <0 .001.


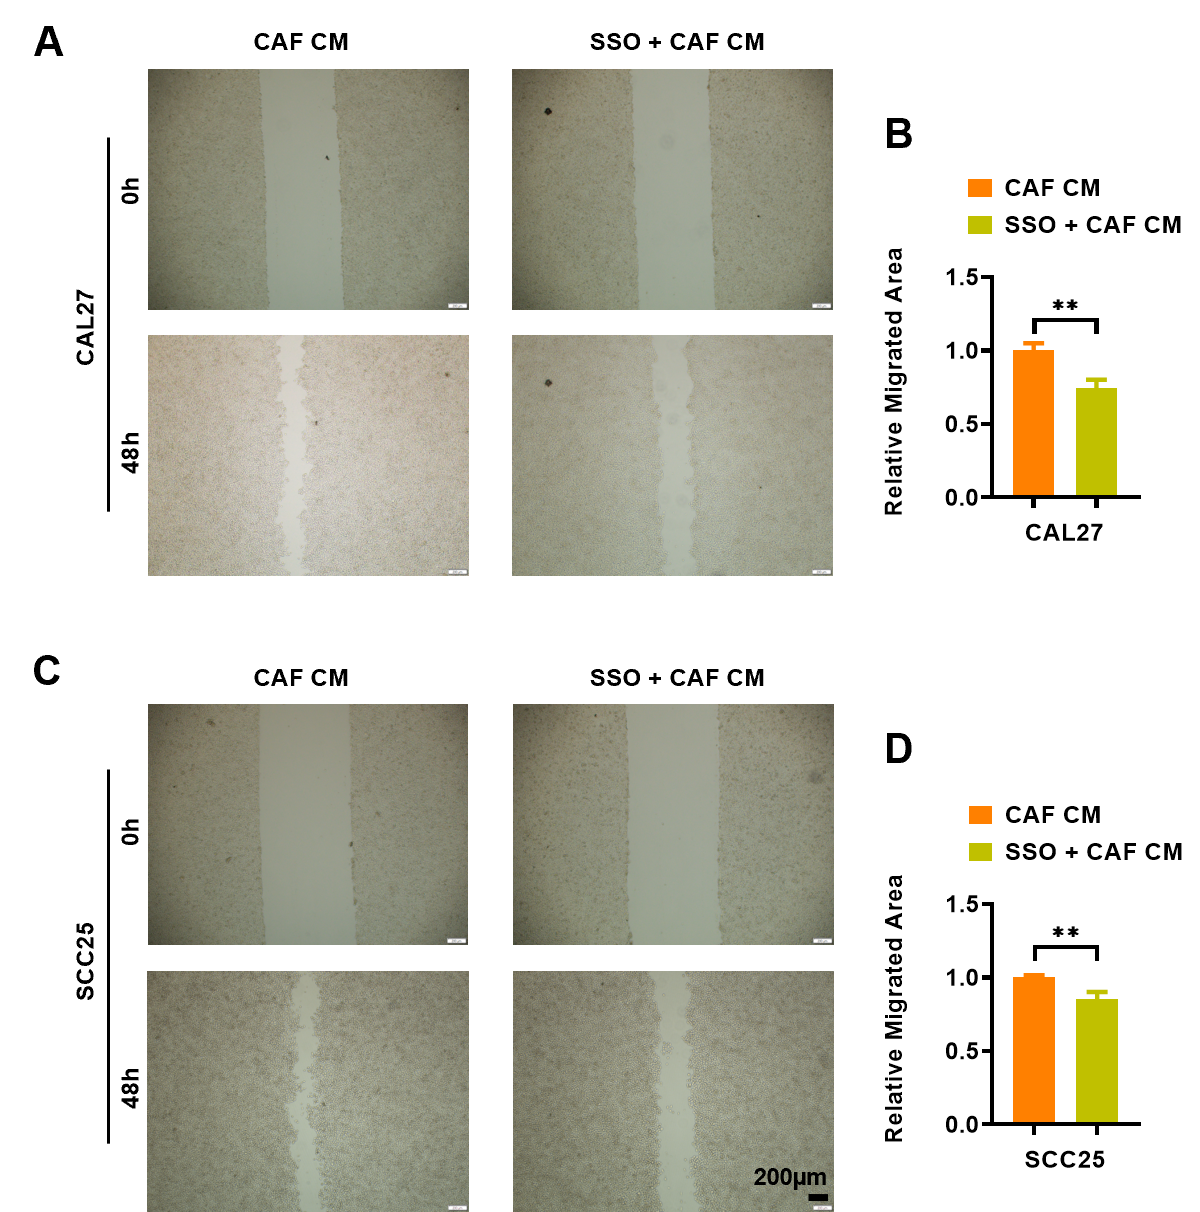


**Fig. S3 CD36 inhibition in OSCC cells reduced CAF tumor-promoting effect on OSCC cell migration. A** and **C** Cell migration abilities of OSCC cells were analyzed by Wound healing assay. The cells were treated with indicated CM. **B** and **D** Quantitative analysis for the migration areaof **A** and **C.** Data are presented as means ± SD. **p*<0 .05, ***p* < 0.01, and ****p* <0 .001.


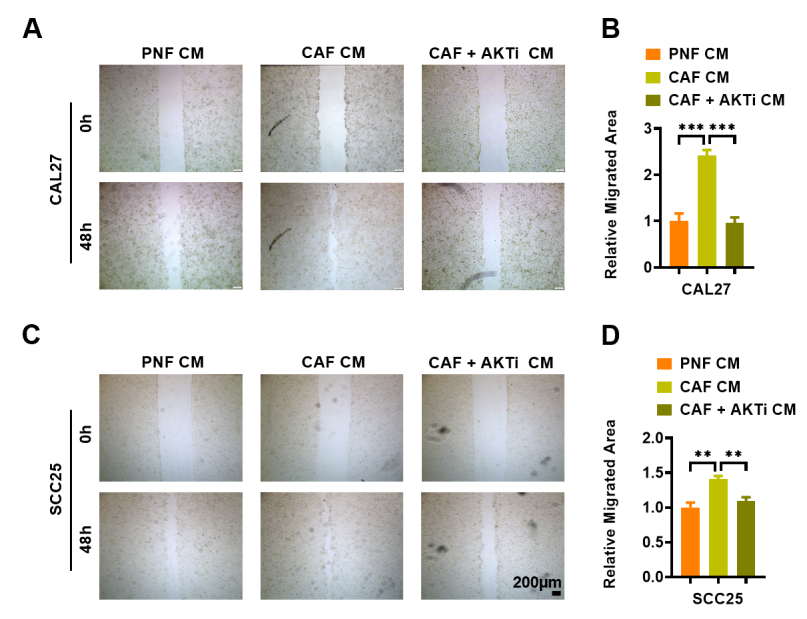


**Fig. S4 AKT signaling blockade in CAFs reduced CAF tumor-promoting effect on OSCC cell migration. A** and **C** Cell migration abilities of OSCC cells were analyzed by Wound healing assay. The cells were treated with indicated CM. **B** and **D** Quantitative analysis for the migration areaof **A** and **C.** Data are presented as means ± SD. **p* <0 .05, ***p* < 0.01, and ****p* <0 .001.

**
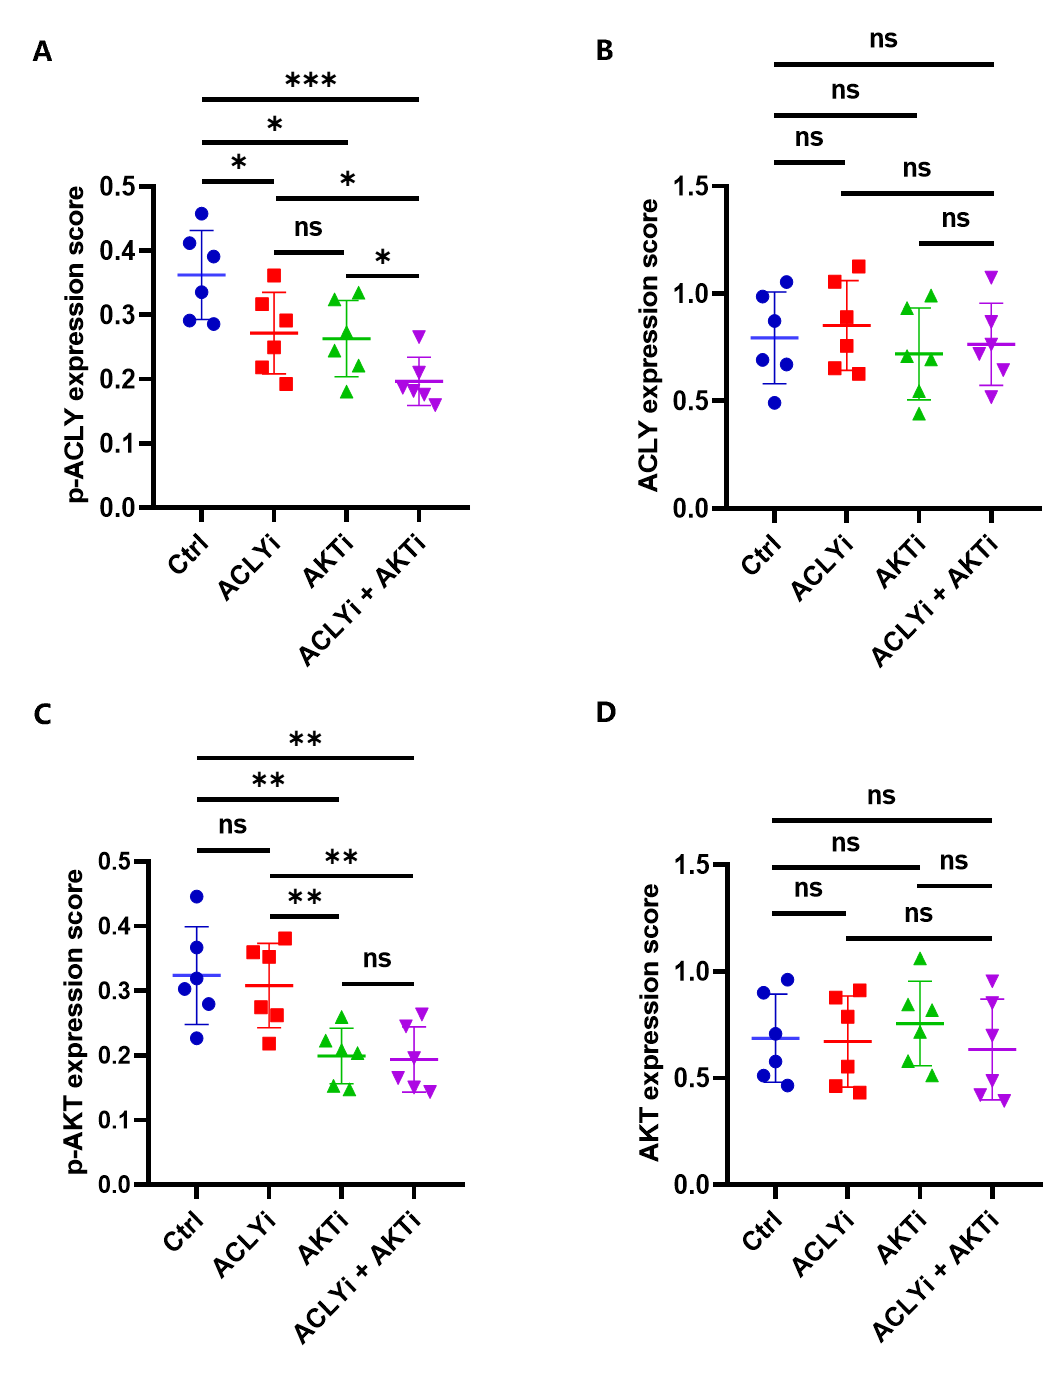
**

**Fig. S5 IHC scores of p-ACLY, ACLY, p-AKT and AKT in stromal region of xenograft tumors.** **A** IHC score of p-ACLY. **B** IHC score of ACLY. **C** IHC score of p-AKT. **D** IHC score of AKT. Data are presented as means ± SD. **p* <0 .05, ***p*< 0.01, and ****p*<0 .001.
